# Supplementary material for: Enhanced extraction of skin interstitial fluid using a 3D printed device enabling tilted microneedle penetration
Source: PubMed Central journal article supplement (PMC8263571; doi:10.1038/s41598-021-93235-3), 2021-07-07
Supplement: 41598_2021_93235_MOESM1_ESM.pdf [file 41598_2021_93235_MOESM1_ESM.pdf]

**Supplementary Information**

**Enhanced extraction of skin interstitial fluid using a 3D printed device  
enabling tilted microneedle penetration**

*Sanha Kim<sup>1</sup>, Min Suk Lee<sup>2</sup>, Hee Seok Yang<sup>2,3</sup>, and Jae Hwan Jung<sup>1\*</sup>*

<sup>1</sup> Department of Pharmaceutical Engineering, Dankook University, 119 Dandae-ro, Dongnam-gu, Cheonan, 31116, Republic of Korea

<sup>2</sup> Department of Nanobiomedical Science & BK21 FOUR NBM Global Research Center for Regenerative Medicine, Dankook University, Cheonan 31116, Republic of Korea

<sup>3</sup> Center for Bio-Medical Engineering Core-Facility, Dankook University, Cheonan, 31116, Republic of Korea

\*Corresponding author. E-mail: [jjahwan@dankook.ac.kr](mailto:jjahwan@dankook.ac.kr)

## TMICS (mm)

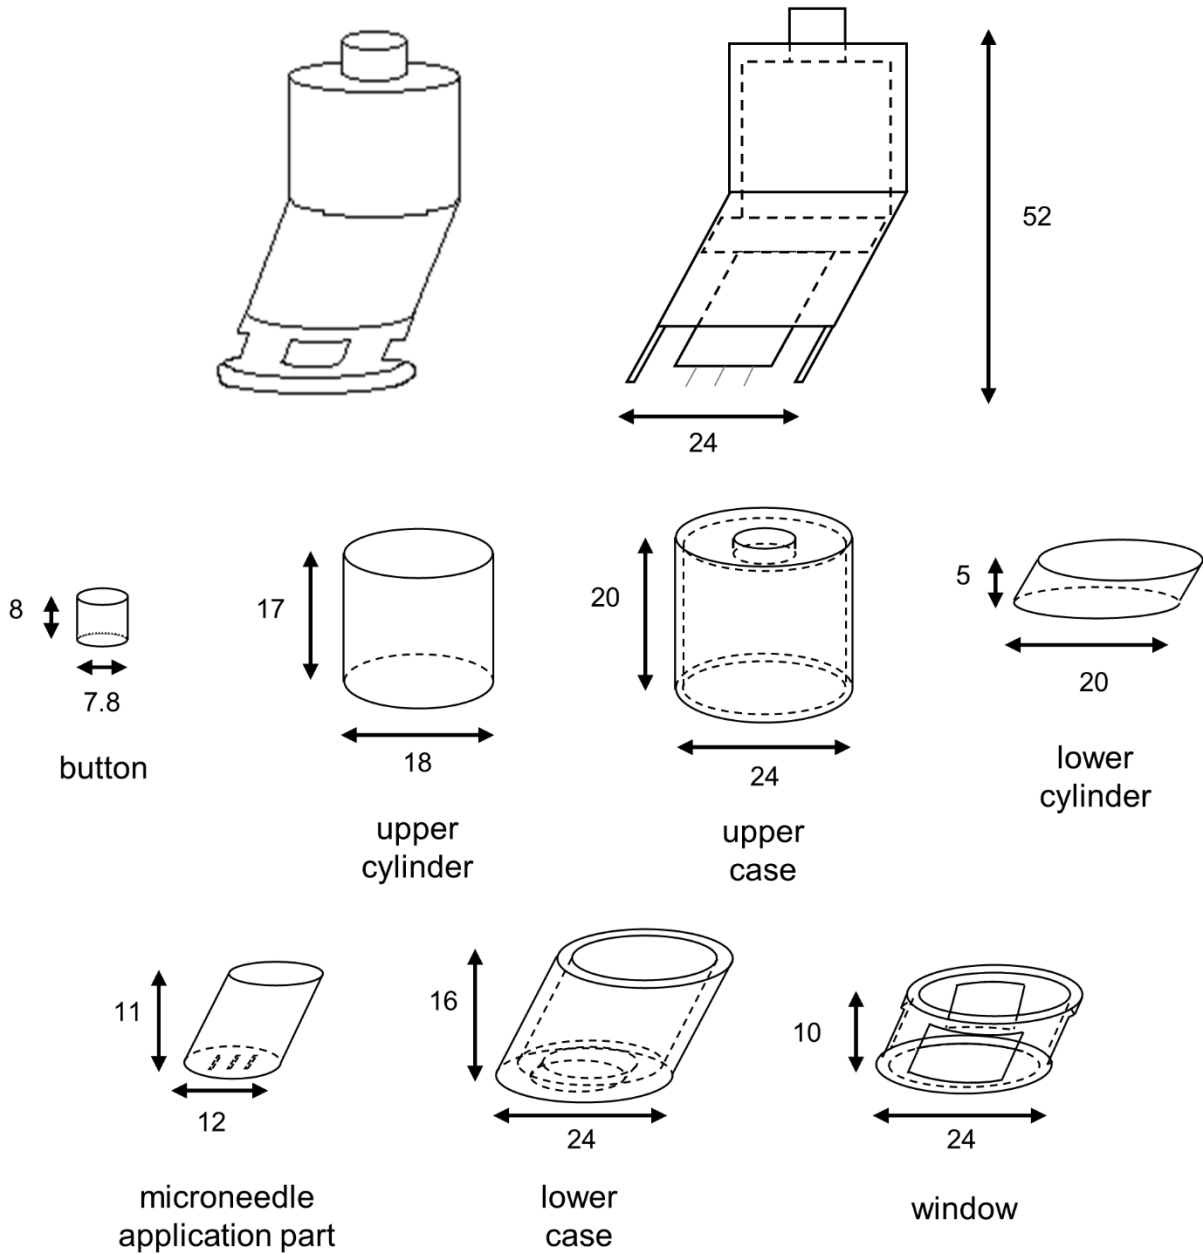

**Fig. S1: CAD design of TMICS components.** Design and specification outside and inside of the assembled TMICS and individual parts: a button, a cylinder in upper case, an upper case, a cylinder in lower case, an MN application part, a lower case, the windows. (All values are in mm.)

## SMICS (mm)

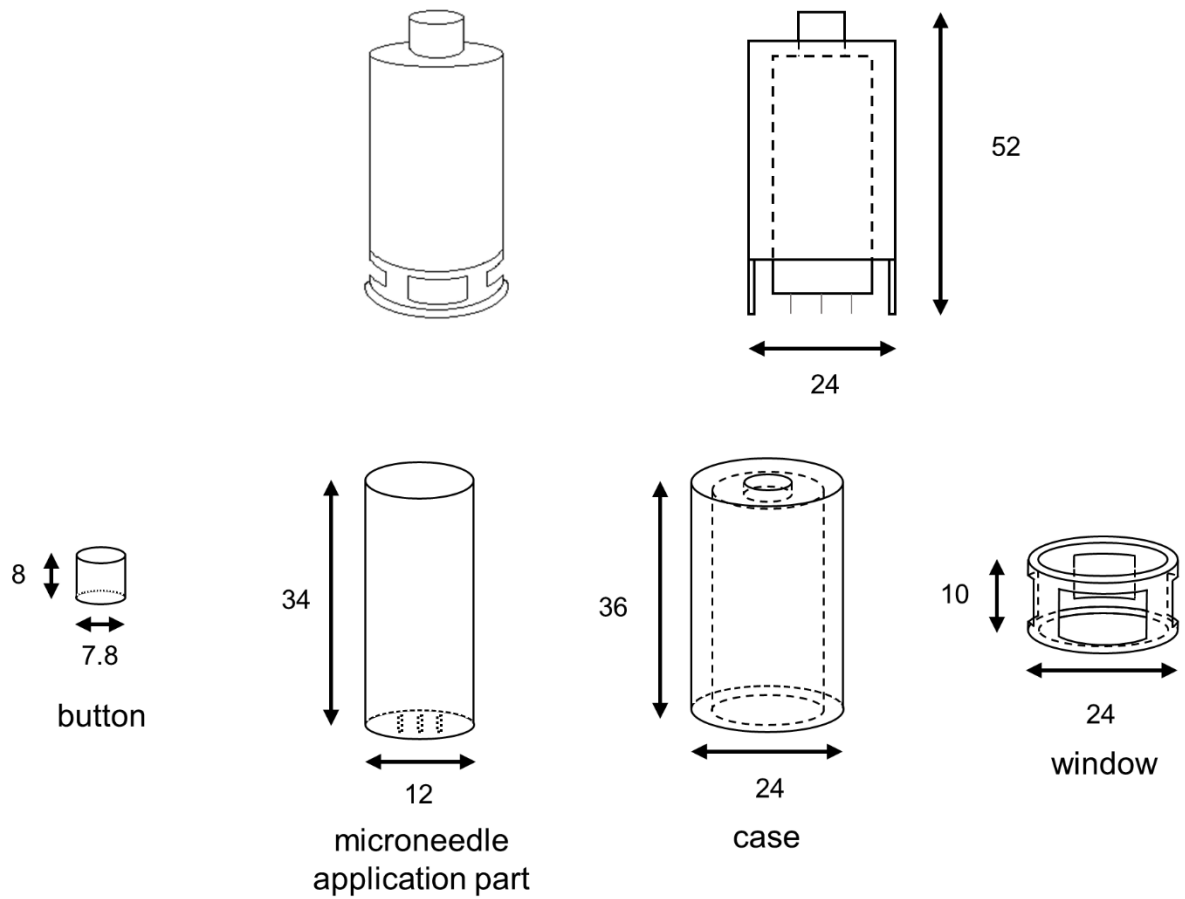

**Fig. S2: CAD design of SMICS components.** Design and specification outside and inside of the assembled TMICS and individual parts: a button, an MN application part in the case, SMICS case, the windows (All values are in mm.).

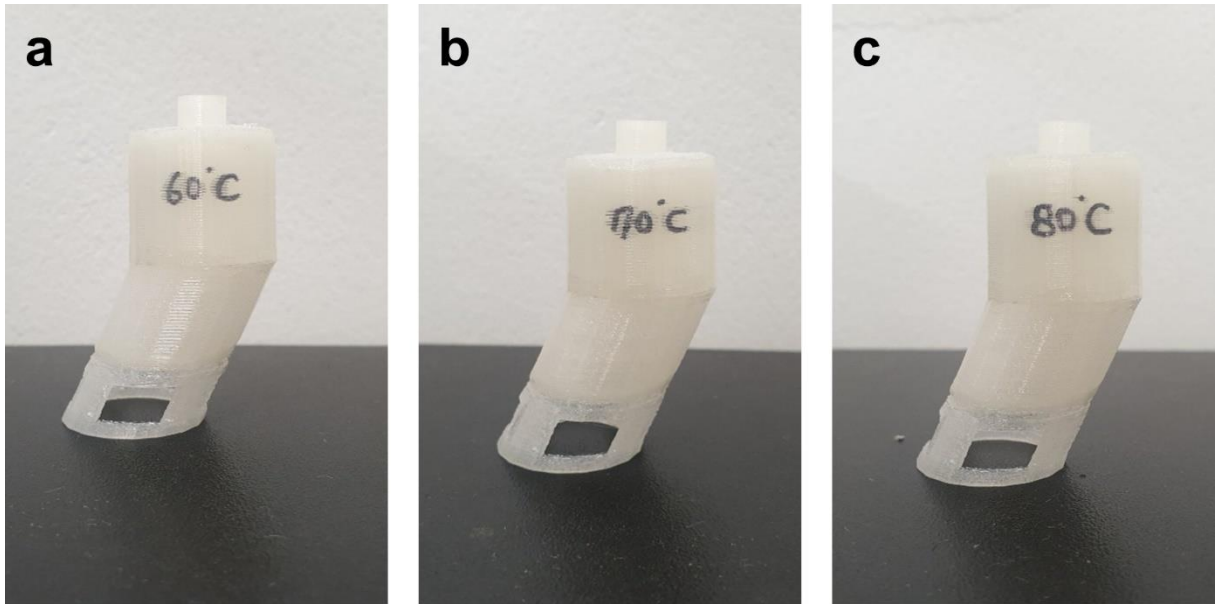

**Fig. S3: Optimizing the temperature condition of the FDM 3D printing.** The temperature of the heating bed was changed from 60 °C (a), 70 °C (b), and 80 °C (c) with maintaining the extruder temperature at 230 °C.

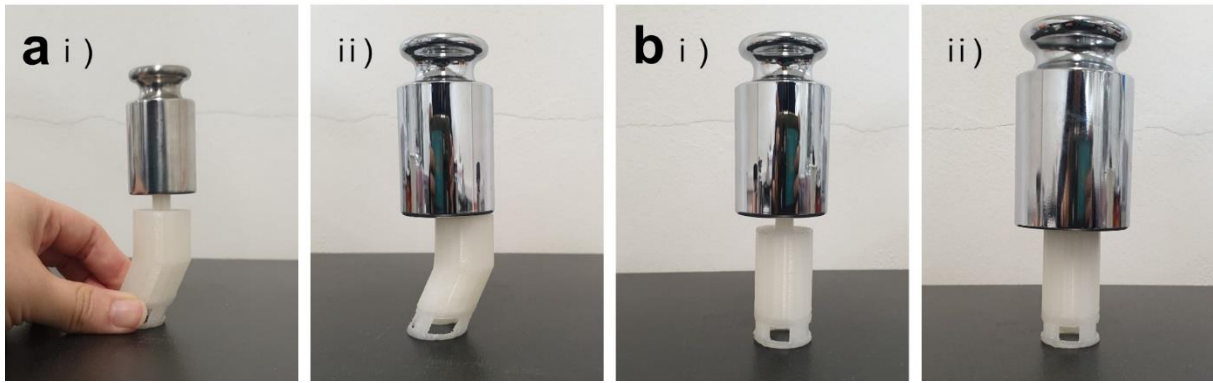

**Fig. S4: Measurement of a minimal requiring force for the MN device operation.** (a) TMICS operating test using a 200 g (i) and a 500 g (ii) weights. (b) SMICS operating test using a 500 g (i) and 1 kg (ii) weights. All the tests were repeated at least three times.

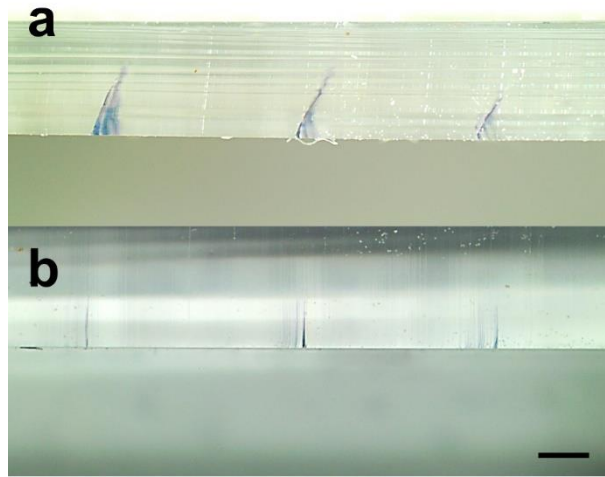

**Fig. S5: Optical images of the MN trace that penetrate to PDMS artificial skin.** (a) TMICS penetrates the MN at  $66.3\pm 0.8$  degrees. (b) SMICS at  $90.2\pm 0.9$  degrees. The scale bar is 500  $\mu\text{m}$ .

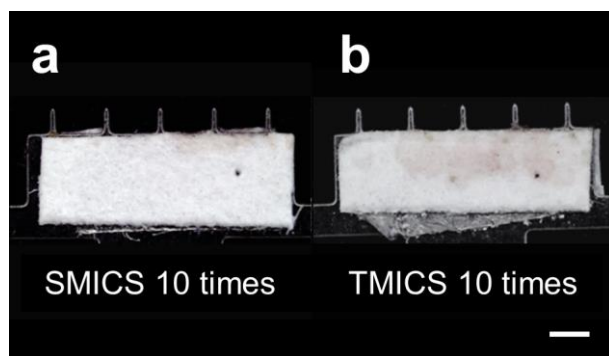

**Fig. S6: Representative images of ISF collected in the paper reservoir from a rat in vivo skin.** (a) ISF collected after applying SMICS 10 times (b) ISF collected after applying TMICS 10 times The scale bar is 1 mm.
